# Supplementary material for: Comparative Analysis of Soil Microbiome Profiles in the Companion Planting of White Clover and Orchard Grass Using 16S rRNA Gene Sequencing Data
Source: Front Plant Sci. 2020 Sep 18;11:538311. doi: 10.3389/fpls.2020.538311 (PMC7530175; doi:10.3389/fpls.2020.538311)
Supplement: Supplementary Table 1 — The relative abundance of dominant community to each group on class level (%).Values with different lowercase superscript letters in the same row indicate the existence of a significant difference (P < 0.05); values with the same letters indicate no significant difference (P > 0.05). [file Table_1.xlsx]

## Sheet: Table S1
Table S1: The relative abundance of dominant community to each group on Class level (%)
Item	Groups
	WC	OG	Mixed
Alphaproteobacteria	20.90±0.68a	16.22±0.94b	16.11±0.70b
Actinobacteria	15.63±1.70a	19.98±1.65a	17.22±1.41a
Betaproteobacteria	16.91±0.73a	14.25±1.06b	14.87±0.61ab
Gemmatimonadetes	16.68±1.63a	10.88±1.80b	17.83±0.71a
Sphingobacteriia	9.28±0.41a	7.75±0.29b	7.72±0.22b
Gammaproteobactria	4.19±0.58b	8.22±2.17a	3.96±0.88b
Deltaproteobacteria	4.35±0.57a	5.07±0.51a	4.56±0.28a
Thermoleophilia	3.01±0.37b	4.51±0.51a	5.07±0.52a
Acidobacteria	2.25±0.20b	2.78±0.35ab	3.49±0.21a
Acidimicrobiia	1.35±0.10b	2.61±0.29a	3.05±0.29a
Cytophagia	1.41±0.19ab	1.98±0.34a	1.23±0.10b
Holophagae	0.83±0.14a	1.69±0.37a	1.69±0.30a
Flavobacteriia	1.09±0.25ab	1.12±0.22a	0.27±0.06b
Nitrospira	0.28±0.05a	0.32±0.07a	0.37±0.07a
Rubrobacteria	0.14±0.04b	0.22±0.02b	0.39±0.05a
MB_A2_108	0.12±0.02b	0.26±0.05a	0.23±0.03a
Chlorobia	0.18±0.03a	0.21±0.02a	0.19±0.01a
uncultured_bacterium	0.14±0.02a	0.14±0.03a	0.16±0.03a
ML635J_21	0.21±0.05a	0.10±0.03ab	0.07±0.02b
Bacilli	0.07±0.02a	0.10±0.02a	0.18±0.08a
Chloroflexia	0.07±0.01b	0.12±0.01a	0.10±0.01ab
Chloroplast	0.09±0.02a	0.03±0.01a	0.09±0.03a
Ktedonobacteria	0.08±0.01a	0.06±0.01a	0.05±0.02a
OPB35_soil_group	0.03±0.005b	0.10±0.01a	0.06±0.01ab
Fibrobacteria	0.02±0.007b	0.10±0.03a	0.07±0.01a
KD4_96	0.04±0.004b	0.07±0.01a	0.06±0.01a
Elusimicrobia	0.03±0.005b	0.08±0.02a	0.05±0.006ab
uncultured_Candidatus_Saccharibacteria_bacterium	0.03±0.01a	0.06±0.01a	0.05±0.02a
Clostridia	0.04±0.004a	0.04±0.01a	0.04±0.01a
Melainabacteria	0.06±0.03a	0.01±0.005a	0.00±0.00b
Note: Values with different lowercase superscript letters in the same row indicate the existence of a significant difference (P< 0.05); values with the same letters indicate no significant difference (P> 0.05)
